# Supplementary material
Source: MDPI journal article supplement (https://www.mdpi.com/2311-5637/9/12/1007)
Supplement: s1 [file s1]

TGGCTCAGGACGAACGCTGGCGGCGTGCTTAACACATGCAAGTCGAACGGAAA  
GGCCCTTCGGGGTACTCGAGTGGCGAACGGGTGAGTAACACGTGGGTGATCTG  
CCCTGCACTTTGGGATAAGCCTGGGAAACTGGGTCTAATACCGAATATGATCAT  
CGGCTTCATGGTTCGGTGGTGGAAGCTTTTGCGGTGTGGGATGGGCCCCGCGGCC  
TATCAGCTTGTGTTGGTGGGGTAATGGCCTACCAAGGCGACGACGGGTAGCCGGC  
CTGAGAGGGTGACCGGCCACACTGGGACTGAGATACGGCCCAGACTCCTACGG  
GAGGCAGCAGTGGGGAATATTGCACAATGGGCGCAAGCCTGATGCAGCGACGC  
CGCGTGAGGGATGACGGCCTTCGGGTTGTAAACCTCTTTCAGCACAGACGAAGC  
GCAAGTGACGGTATGTGCAGAAGAAGGACCGGCCAACTACGTGCCAGCAGCC  
GCGGTAAATACGTAGGGTCCGAGCGTTGTCCGGAATTACTGGGCGTAAAGAGCT  
CGTAGGTGGTTTTGTCGCGTTGTTCTGTGAAAACCTCACAGCTTAACTGTGGGCGTGC  
GGGCGATACGGGCAGACTAGAGTACTGCAGGGGAGACTGGAATTCCTGGTGTA  
GCGGTGGAATGCGCAGATATCAGGAGGAACACCGGTGGCGAAGGCGGGTCTCT  
GGGCAGTAACTGACGCTGAGGAGCGAAAGCGTGGGGAGCGAACAGGATTAGA  
TACCCTGGTAGTCCACGCCGTAAACGGTGGGTACTAGGTGTGGGTTTCCTTCCTT  
GGGATCCGTGCCGTAGCTAACGCATTAAGTACCCCGCCTGGGGAGTACGGCCG  
CAAGGCTAAAACCTCAAAGGAATTGACGGGGGGCCCGCACAAGCGGCGGAGCAT  
GTGGATTAATTCGATGCAACGCGAAGAACCTTACCTGGGTTTGACATGCACAGG  
ACGCTGGTAGAGATATCAGTTCCCTTGTGGCCTGTGTGCAGGTGGTGCATGGCT  
GTCGTCAGCTCGTGTCGTGAGATGTTGGGTAAAGTCCCGCAACGAGCGCAACCC  
TTGTCCTATGTTGCCAGCGGGTTATGCCGGGGACTCGTAGGAGACTGCCGGGGT  
CAACTCGGAGGAAGGTGGGGATGACGTCAAGTCATCATGCCCTTATGTCCAG  
GGCTTCACACATGCTACAATGGCCGGTACAAAGGGCTGCGATGCCGTGAGGTG  
GAGCGAATCCTTTCAAAGCCGGTCTCAGTTCGGATCGGGGTCTGCAACTCGACC  
CCGTGAAGTCGGAGTCGCTAGTAATCGCAGATCAGCAACGCTGCGGTGAATAC  
GTTCCCGGGCCTTGTACACACCGCCCGTCACGTCATGAAAGTCGGTAACACCCG  
AAGCCGGTGGCCTAACCCCTTGTGGGAGGGAGCCGTCTGAAGGTGGGATCGGCG  
ATTGGGACGAAGTCGTACAG

**Figure S1.** Nucleotide sequence of the 16S rRNA gene of *M. neoaurum* strain Ac 501/22.

**Table S1.** Total nitrogen/protein content in each of the tested nitrogen sources.

| <b>Nitrogen sources</b>         | <b>Producer</b>                            | <b>Nitrogen/protein content, %</b> |
|---------------------------------|--------------------------------------------|------------------------------------|
| Skimmed deodorated soybean meal | Yanta Ltd., Irkutsk, Russia                | 42-44                              |
| Soy peptone                     | Conda Pronadisa, Madrid, Spain             | 9-11 (total nitrogen)              |
| Skimmed milk powder             | HiMedia Laboratories Ltd., Mumbai, India   | 35                                 |
| Pea flour                       | Garnets Ltd., Vladimir, Russia             | 21                                 |
| Yeast extract                   | HiMedia Laboratories Ltd., Mumbai, India   | 10.5 (total nitrogen)              |
| Yeast peptone                   | Angel Yeasters Rus., Ltd., Lipetsk, Russia | 13 (total nitrogen)                |
| Meat pepton                     | HiMedia Laboratories Ltd., Mumbai, India   | 14                                 |
